# 1 **Predicting re-emergence times of dengue epidemics at low reproductive**

## 2 **numbers: DENV1 in Rio de Janeiro, 1986-1990.**

3 Rahul Subramanian, Victoria Romeo-Aznar, Edward Ionides, Claudia T. Codeço, and  
4 Mercedes Pascual

### 5 **Abstract:**

6 Predicting arbovirus re-emergence remains challenging in regions with limited off-  
7 season transmission and intermittent epidemics. Current mathematical models treat the  
8 depletion and replenishment of susceptible (non-immune) hosts as the principal drivers  
9 of re-emergence, based on established understanding of highly transmissible childhood  
10 diseases with frequent epidemics. We extend an analytical approach to determine the  
11 number of 'skip' years preceding re-emergence for diseases with continuous seasonal  
12 transmission, population growth and under-reporting. Re-emergence times are shown  
13 to be highly sensitive to small changes in low  $R_0$  (secondary cases produced from a  
14 primary infection in a fully susceptible population). We then fit a stochastic SIR  
15 (Susceptible-Infected-Recovered) model to observed case data for the emergence of  
16 dengue serotype DENV1 in Rio de Janeiro. This aggregated city-level model  
17 substantially over-estimates observed re-emergence times either in terms of skips or  
18 outbreak probability under forward simulation. The inability of susceptible depletion and  
19 replenishment to explain re-emergence under 'well-mixed' conditions at a city-wide  
20 scale demonstrates a key limitation of SIR aggregated models including those applied  
21 to other arboviruses. The predictive uncertainty and high skip sensitivity to  
22 epidemiological parameters suggest a need to investigate the relevant spatial scales of  
23 susceptible depletion and the scaling of microscale transmission dynamics to formulate  
24 simpler models that apply at coarse resolutions.

## 25 **Introduction:**

26           Epidemics of arboviruses such as dengue (1), Zika (2, 3), and chikungunya (4)  
27 result in substantial global morbidity. Over the past decade, invasions of several  
28 arboviruses have triggered large outbreaks in the Western Hemisphere. In Brazil, these  
29 invasions include dengue serotype DENV4 in 2012 (5) as well as Zika (2, 6) and  
30 chikungunya (7) between 2014-2016. Predicting and understanding the re-emergence  
31 of arboviruses after these invasions has important consequences for epidemic  
32 preparedness, particularly in regions where climate factors limit mosquito transmission  
33 in the off-season. These regions typically exhibit highly intermittent seasonal  
34 epidemics, lasting one to three years with long periods of no, or low, reported cases in  
35 between, and low mean reproductive numbers (the number of secondary cases arising  
36 from each primary case in a completely susceptible population,  $R_0$ ) (5, 8-10). Several  
37 proposed explanations include the depletion of susceptible individuals following initial  
38 epidemics (11) and the time required for their replenishment via population growth (12),  
39 inter-annual variation in climate (13-17), and antigenic interactions between strains of  
40 different serotypes (18-21). These temporal patterns contrast with the recurrent  
41 seasonal outbreaks observed in childhood diseases with high reproductive numbers,  
42 whose extensive study has provided the basis for our theoretical understanding of SIR  
43 (Susceptible-Infected-Recovered) dynamics in infections that confer lifelong or lasting  
44 immune protection (22-29).

45           Statistical models of dengue transmission that take into account climate  
46 dependencies can be used to make short-term re-emergence forecasts on the order of  
47 4 months (30) or 16 weeks (15). Many epidemiological models that predict the re-  
48 emergence of arboviruses such as Zika (11, 31) on longer time-scales of a year (11) or

49 several decades (31) rely however on compartmental formulations such as SIR-type  
50 approaches (11) or Ross-McDonald equations that explicitly incorporate vector  
51 transmission (31). Both formulations assume transmission between any two individuals  
52 in the population ('well-mixed' conditions), typically at aggregated spatial scales. These  
53 process-based formulations, for example those recently applied to Zika, represent the  
54 acquisition of immunity in the population and its loss via demographic growth and  
55 turnover. These models do take into account seasonality of transmission and spatial  
56 heterogeneity in the intensity of transmission due to climate at coarse resolutions (at  
57 large city, state, or country-level scales). Nevertheless, the replenishment of a well-  
58 mixed susceptible population is the principal driver determining when the disease will  
59 re-emerge given a particular seasonal pattern for  $R_0$  at a particular location.  
60 Stochasticity can also play an important role in long-term models of re-emergence (31).  
61 Variation in reporting rates of arboviruses between locations (32) can add further  
62 complexity.

63         Although childhood diseases with high reproductive numbers display different  
64 dynamics from emergent arboviruses (22-26), their compartmental models share a  
65 basic SIR structure given the acquisition of long-term immunity after infection. The  
66 resulting depletion and replenishment of the susceptible population is known to clearly  
67 drive inter-annual variability and re-emergence in the former (25, 27, 28). In particular,  
68 recent theory (29) has derived analytical expressions for the number of "skip" years for  
69 a measles-like disease in the pre-vaccine era, where "skips" are defined as seasons  
70 when transmission occurs but does not cause susceptible depletion. In other words,  
71 although the number of infections increases in such seasons, it is not large enough to  
72 offset the growth in the susceptible population due to demography. The resulting  
73 expressions specifically provide a threshold condition for the number of skips expected

74 following an initial invasion as a function of  $R_0$ . Their derivation did not include under-  
75 reporting and assumed a closed-population SIR model with ‘school-term’ seasonality,  
76 alternating two different rates for low and high transmission.

77         We examine in this work whether replenishment of susceptible individuals under  
78 the typical ‘well-mixed’ assumption explains dengue (DENV1) re-emergence at the  
79 whole-city aggregated level. We specifically address the uncertainty inherent in such  
80 predictions at the low reproductive numbers characteristic of arboviruses, not previously  
81 considered in applications of the analytical approach. To this end, we first extend the  
82 threshold derivation to take into account population growth, continuous (sinusoidal)  
83 seasonality, and under-reporting of cases. We then fit a stochastic SIR model to  
84 observed monthly dengue case counts from the DENV1 invasion in Rio de Janeiro,  
85 Brazil from 1986-1988 (8, 10, 33) and numerically predict expected times to re-  
86 emergence. We describe high uncertainty in re-emergence times for these seasonal,  
87 low transmission regions, and show the insufficiency of susceptible replenishment in a  
88 simple SIR model to explain the short periods observed in DENV1 re-emergence. We  
89 discuss possible explanations and the need for model formulations that would scale to  
90 coarse spatial resolutions.

91

## 92 **Results:**

93         We start with the analytical approach for a seasonally forced SIR system with in-  
94 termittent outbreaks and population turnover, to consider general features of re-emer-  
95 gence at low  $R_0$ . In such a system, the onset of the off-season can bring an end to an  
96 initial outbreak, and the replenishment of susceptible individuals due to births and popu-  
97 lation turnover can be a major determinant of recurrence times. Let  $S$  represent the

98 number of susceptible individuals in a population and  $s_0$ , the fraction of the population  
99 still susceptible at the end of an initial epidemic,  $t_0$ , when a prediction for the time to  
100 the next outbreak will be made. If there are enough susceptible individuals left in the  
101 population (i.e. if  $s_0$  is large), another outbreak will occur in the following year once the  
102 on-season resumes. However, if the initial outbreak was very large,  $s_0$  may be too small,  
103 and the outbreak may “skip” one or more years. A skip year is defined as a year in  
104 which the susceptible population does not decrease, whether or not infections increase.  
105 The smaller the fraction of the susceptible population at the time of prediction ( $s_0$ ), the  
106 longer it will take for the susceptible population to replenish, and the larger the number  
107 of skips that will occur. Previous theory allows prediction of the number of skips that will  
108 occur given  $s_0$ . Specifically, it demonstrated that  $s_0$  must fall below some threshold  $s_c(k)$   
109 for  $k$  skips to occur. An analytical expression was provided for  $s_c(k)$  in terms of the re-  
110 productive number and population turnover rate for a closed-population SIR model with  
111 school-term seasonality (29). The derivation of the threshold presented in (29) requires  
112 the assumption that the transmission rate or reproductive number of the disease is high  
113 and that the fraction of the population susceptible at the time of prediction ( $s_0$ ) is small.

114 We extend this approach to take into account population growth and sinusoidal  
115 seasonality (which describes the transmission rate of dengue more accurately than a  
116 discrete high-low representation). Our derivation does not require assuming that the  
117 transmission rate or reproductive number are high or that the fraction of the population  
118 susceptible at the time of prediction is small. We follow the criteria developed in (29) (see  
119 details in (34)), which essentially consider the sign of the logarithm of the ratio between  
120 the respective number of infections at two times,  $t_0$  and  $t_n > t_0$ . A positive value indicates  
121 that an outbreak will still occur at  $t_n$ ; conversely a negative value indicates no outbreak at

122 that time. By setting the logarithm of this ratio to zero, the threshold  $s_c$  is obtained (See  
123 Section 1 of the Supporting Information for details).

124 The resulting expression for  $s_c(n)$ , the critical fraction of susceptible individuals  
125 required at the time of prediction for  $n$  or more skip seasons to occur, is

$$126 \quad s_c(n) = 1 + \frac{\pi(2n+1)(1-\frac{1}{R_0})-2\delta}{\omega f(\omega, \delta, r, n)} \quad (1)$$

127 where  $f(\omega, \delta, r, n) = (1 + e^{-r\frac{\pi}{\omega}(2n+1)})\omega \delta / (\omega^2 + r^2) - (1 - e^{-r\frac{\pi}{\omega}(2n+1)})/r$ ,  $R_0$  is the  
128 annual mean of the reproductive number,  $\delta$ , the amplitude of seasonal transmission (as  
129 infectious contacts per person per day),  $\omega$ , the transmission frequency (in days<sup>-1</sup>) and  $r$ ,  
130 the population growth rate (also in days<sup>-1</sup>). The full expression for the seasonal  
131 transmission rate is given by  $\beta(t) = \beta_0(1 + \delta \sin(\omega t + \phi))$ , where  $\phi$  corresponds to the  
132 phase (in radians) and  $\beta_0$ , to the mean seasonal transmission rate (infectious contacts  
133 per person per day). The quantity  $\beta_0$  is related to the annual mean reproductive number  
134  $R_0$  via the expression  $R_0 = \beta_0/\gamma$ , where  $\gamma$  is the recovery rate (in days<sup>-1</sup>).

135 Figure 1 illustrates the implications of this formula. As before,  $t_0$  corresponds to  
136 the time of prediction, in practice usually after a large initial epidemic or invasion. Like-  
137 wise,  $s_0$  represents the fraction of the population susceptible at the time of prediction. In-  
138 tuitively, the smaller the fraction of the population susceptible at the time of prediction  
139 ( $s_0$ ), the longer it will take for the susceptible population to replenish, and the larger the  
140 number of skips that will occur. In practice, as we will illustrate below, values of  $s_0$  can  
141 be computed from surveillance data provided one has an estimate of the reporting rate.

142 For  $n$  skips to occur, the fraction of the population susceptible at the time of pre-  
143 diction ( $s_0$ ) must fall below the susceptibility threshold  $s_c(n)$ . Figure 1A shows that the  
144 larger the number of skips  $n$  one is considering, the smaller the threshold  $s_c(n)$  that  $s_0$

145 must fall below for at least  $n$  skips to occur. Let  $n_c$  denote the critical skip number cor-  
 146 responding to the number of skips expected at the time of prediction ( $t_0$ ). We use the  
 147 fraction of the population susceptible at the time of prediction ( $s_0$ ) and identify the maxi-  
 148 mum value of  $n$  for which  $s_0$  is smaller than  $s_c(n)$ . In the example shown in Fig. 1A, this  
 149 fraction  $s_0 = 0.7$  is smaller than  $s_c(n = 6)$  and bigger than  $s_c(n = 7)$ , which means  $n_c = 6$ .  
 150 We therefore expect six years of skips followed by re-emergence in the seventh year.  
 151 Formally, for a given value of  $s_0$  at the end of the transmission season, we define the  
 152 critical skip number  $n_c$  as the value of  $n$  for which  $s_c(n_c) > s_0 > s_c(n_c + 1)$ .

153

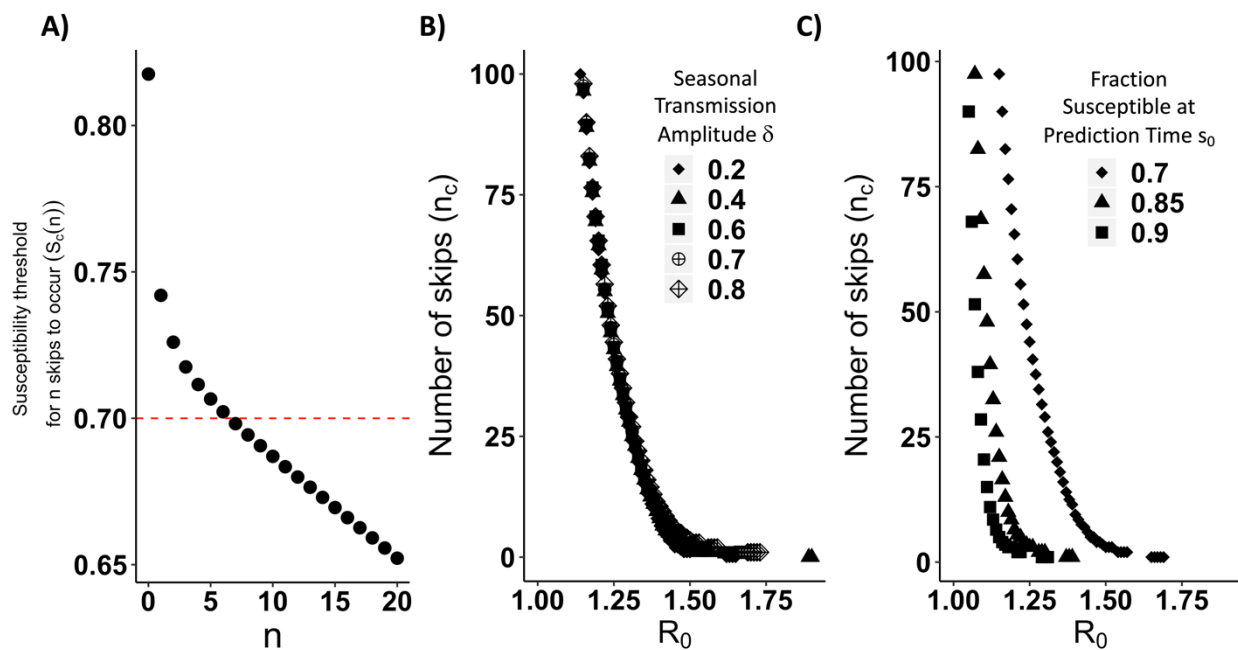

154

155 **Fig 1. A) Graphical illustration of how the expected number of skips ( $n_c$ ) is**  
 156 **calculated.** The black dots represent the threshold fraction of the population susceptible  
 157 at the time of prediction required for  $n$  skips to occur ( $s_c(n)$ ). The plot shows ( $s_c(n)$ ) as a  
 158 function of  $n$  (the number of skips) obtained from Equation 1 with seasonality amplitude  
 159  $\delta=0.2$  (contacts per person per day) and reproductive number  $R_0=1.4$ . In this example,  
 160 the red line represents the fraction of the population susceptible at the time of prediction  
 161 ( $s_0$ ). If  $s_0$  is smaller than  $s_c(n)$ , at least  $n$  skips will occur. To find the expected number of  
 162 skips ( $n_c$ ), we identify the largest number of skips  $n$  such that  $s_0$  is smaller than the  
 163 susceptibility threshold required for those skips  $s_c(n)$ . In this example, the red line  
 164 intersects the  $s_c(n)$  curve between  $s_c(n=6)$  and  $s_c(n=7)$ . Therefore, a critical skip number

165 of  $n_c=6$  is obtained. **B) and C) The critical skip value  $n_c$  as a function of  $R_0$**  for (B)  
166 different values of the amplitude of seasonal transmission  $\delta$  with  $s_0=0.7$  and (C) different  
167 values of the fraction of the population susceptible at the time of prediction ( $s_0$ ) with  
168  $\delta=0.70$ . In all three panels, the frequency of transmission  $\omega$ , the population turnover rate  
169  $\mu$ , and population growth rate  $r$  are fixed at respective values  $\omega = (2\pi/365) \text{ day}^{-1}$   
170 corresponding to an annual periodicity,  $\mu= 1/ (74.46*365)) \text{ day}^{-1}$  corresponding to an  
171 average lifespan of  $\sim 75$  years, and  $r=1.55\mu \text{ day}^{-1}$  consistent with the growth of the city of  
172 Rio de Janeiro. These values were chosen for the purpose of illustration, based on the  
173 inverse of the average life expectancy in Brazil in 2012 according to the 2010 census  
174 (35), and the interpolation of population estimates for the resident population of the  
175 municipality of Rio de Janeiro from the 1991 (36) and 2000 (37) censuses assuming  
176 exponential growth.

177

178         With this general approach at hand, we explored the effects of the reproductive  
179 number  $R_0$ , amplitude of seasonal transmission  $\delta$  and fraction of the population  
180 susceptible at time of prediction  $s_0$ , on the critical number of skips  $n_c$  (Figure 1 Panels B  
181 and C). Consideration of both the variation of the reproductive number  $R_0$  and fraction of  
182 the population susceptible at time of prediction  $s_0$  is relevant here. Different combinations  
183 of transmission rate ( $\beta_0$ ) and duration of the infection ( $1/\gamma$ ) can yield the same  $R_0$  but  
184 different fractions of the population susceptible at the time of prediction (Supplemental  
185 Figure S16). Importantly, Fig. 1 panels B and C show that the time to re-emergence is  
186 very sensitive to  $R_0$ . A singularity is observed as  $R_0$  approaches 1 where the expected  
187 number of skips goes to infinity. The approach to that singularity can be very steep,  
188 meaning that small changes in  $R_0$  can result in large increases in the expected re-  
189 emergence time. The obtained values of  $n_c$  are not as sensitive to the amplitude of  
190 seasonal transmission (Fig. 1 Panel B) but are sensitive to the fraction of the population  
191 susceptible at the time of prediction (Fig. 1 Panel C). The shift of the curve in Fig 1 Panel  
192 C for small values of the fraction of the population susceptible at time of prediction  $s_0$   
193 means that, for a given  $R_0$ , more time is required to replenish the susceptible population  
194 and therefore to observe a re-emergence.



195 We next apply this approach to the surveillance data from the 1986 invasion of  
196 DENV1 in Rio de Janeiro (Figure 2). The initial DENV1 invasion in Rio de Janeiro is an  
197 ideal initial test case for this technique given the lack of widespread prior immunity from  
198 to prior dengue epidemics, vaccination campaigns, cross-immunity from other disease  
199 outbreaks. Specifically, the 1986 invasion occurred prior to the development of dengue  
200 vaccines. The outbreak was the first dengue invasion in the area since the initial eradi-  
201 cation of the *Aedes aegypti* mosquito in Brazil in the 1950s (38-41) following a sus-  
202 tained intervention program that began in the 1930s and 1940s in Rio de Janeiro and  
203 other cities (39). Cross-immunity from yellow fever vaccination appears to be very lim-  
204 ited (42). Given the young age distribution of the population in 1986 (43), most individu-  
205 als were not alive during the period when mass yellow fever vaccination or prior dengue  
206 epidemics occurred.

207 We let our time of prediction  $t_0$  be equal to September 1, 1987, corresponding to  
208 the end of the initial DENV1 invasion (see panel A of Figure 2). In panel B of Figure 2, we  
209 evaluate the number of expected skips expected in Rio de Janeiro,  $n_c$ , on the basis of a  
210 range of  $R_0$  values from 1.18 to 2.02 from the literature (44, 45). The critical susceptibility  
211 threshold for  $n$  skips to occur ( $s_c(n)$ ) is calculated using Equation 1 with an annual  
212 seasonality, a population growth rate interpolated from the census (see Materials and  
213 Methods section), and  $\delta = 0.7$  (44). The fraction of the population susceptible at the time  
214 of the prediction ( $s_0$ ) is estimated as the difference between the total population  $N_0$  (total  
215 population  $N$  at ( $t_0$ =Sep. 1987)) and the total number of people infected between the start  
216 of the invasion and the time of prediction (September 1, 1987). The total number of  
217 infected people during the outbreak is computed by summing the ratio between the  
218 observed monthly cases and the reporting rate for DENV1 in the city. Literature estimates  
219 from serology during the DENV1 invasion in Rio de Janeiro indicate a reporting rate of

220 around 3% (33) which we use and fix for this analysis. For comparison purposes, we also  
221 include the number of skips expected under a higher reporting rate of 10%. These curves  
222 show that the expected re-emergence could be very sensitive to small variation in  $R_0$  and  
223  $\rho$ , two quantities that are difficult to estimate with precision in the absence of serology. In  
224 particular, assuming a reporting rate of 3%, a reproductive number of 1.2 with 20%  
225 uncertainty can yield large changes in the expected re-emergence time. We highlight the  
226 potential sensitivity of the expected number of skips to the reporting rate as well to  
227 illustrate the importance of uncertainty in this parameter in cities or epidemics where its  
228 value is unknown.

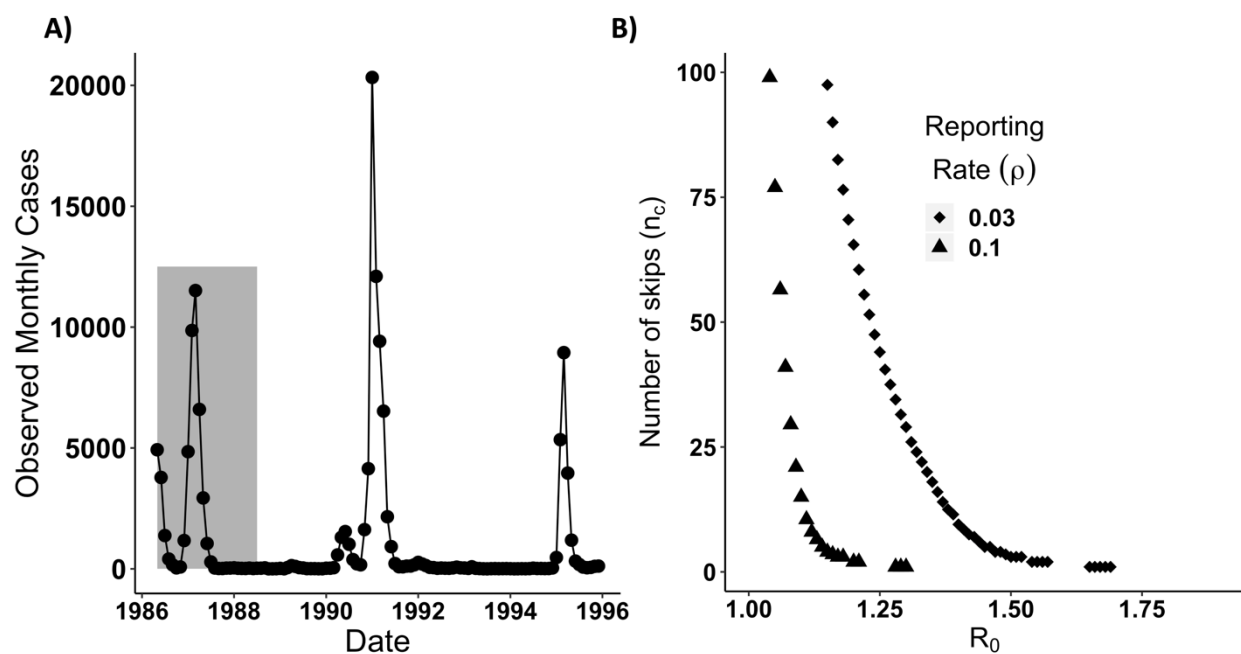

229

230 **Fig 2. (A) Observed dengue case data.** Monthly reported dengue cases in the city of  
231 Rio de Janeiro, Brazil from April 1986-1995. The grey shaded region denotes  
232 observations that were included in the fitting of the stochastic model from May 1, 1986 to  
233 July 1, 1988 inclusive. Serotype DENV1 re-emerged in 1990. DENV2 was first detected  
234 in the state of Rio de Janeiro in 1990 but did not become dominant until 1991 (8, 9). Both  
235 co-circulated afterwards. We focus on the invasion of DENV1 from 1986-1987 and its  
236 initial re-emergence in DENV1 in 1990 using a single serotype transmission model. This  
237 allows us to evaluate this transmission model in a region where only one serotype was  
238 circulating, where cross-immunity could not easily be invoked to explain the absence or  
239 reduction of dengue in a given year. **(B) Deterministic critical number of DENV1 skips**

240  $n_c$  for Rio de Janeiro from September 1988. Expected number of skips  $n_c$  with  
241 amplitude of seasonal transmission  $\delta=0.7$  and the fraction of the population susceptible  
242 after the first DENV1 invasion as of September 1, 1987 ( $s_0$ ) calculated from the data (A).  
243 We use a reporting rate  $\rho$  of 3% when calculating  $s_0$ , consistent with serological  
244 estimates from the literature (33). For comparison purposes, we also include the expected  
245 number of skips  $n_c$  assuming a reporting rate of 10%.

246

247

## 248 **Replenishment of Susceptible Individuals is Insufficient to Explain Re-Emergence**

249 To obtain more precise bounds for the reporting rate and  $R_0$  and to determine if  
250 the depletion and replenishment of susceptible individuals could explain the rapid re-  
251 emergence of dengue in Rio de Janeiro, we fit a stochastic aggregate SIR model to  
252 case data from the DENV1 invasion from 1986-1988. The stochastic SIR model  
253 assumes that the underlying deterministic transmission rate varies seasonally as a  
254 sinusoidal function with annual mean  $\beta_0$ , seasonal transmission amplitude  $\delta$ , frequency  
255  $\omega$  (equal to  $2\pi/365$ ), and phase  $\phi$ . The model takes into account demographic  
256 stochasticity, environmental stochasticity in the transmission rate, and measurement  
257 error due to under-reporting and variation in reporting of cases (See Materials and  
258 Methods and the Supporting Information). Panels A,B, and C of Figure 3 show the  
259 likelihood profile of the annual mean transmission rate,  $\beta_0$ , the amplitude of seasonal  
260 transmission  $\delta$ , and the reporting rate  $\rho$ , respectively. In particular, our estimate of the  
261 reporting rate matches that from serology in the literature (Panel C).

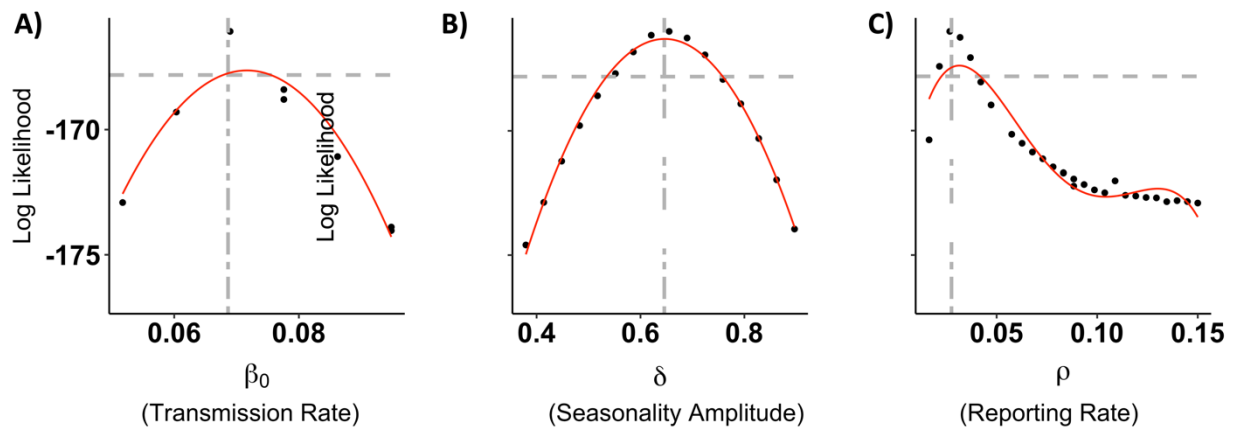

262

263 **Fig 3. A-C) Selected parameter profiles for the stochastic model.** Profiles of the mean  
264 annual transmission rate  $\beta_0$  (A), seasonal transmission amplitude  $\delta$  (B), and reporting rate  
265  $\rho$  (C). The red curve is a polynomial fit to the subset of the profile points shown on the  
266 figure. The single dashed grey horizontal line represents the likelihood value 2 log  
267 likelihood units below the maximum likelihood estimate. This line provides an estimate of  
268 confidence intervals for the given parameter. The grey vertical line denotes the parameter  
269 value of the maximum likelihood estimate. The maximum likelihood estimate for the  
270 reporting rate in panel C is very close to the literature value obtained from serology  
271 (approximately 3 percent). (33).

272

273 Overall, the model is able to capture key dynamics of the DENV1 invasion  
274 including the two peaks of incidence in 1986 and 1987 and the subsequent reduction of  
275 transmission in 1988. This is shown by comparing the trajectories for an ensemble of  
276 simulations with the fitted model to the observed values of cases (Fig. 4). Estimated  
277 values for the transmission rate indicate a low value for  $R_0$  (Figure 4 Panel C). Both of  
278 these conclusions generally hold even if one takes into account uncertainty in  
279 parameter estimates by examining all parameter combinations with log likelihoods  
280 within 2 log likelihood units of the maximum likelihood estimate (the grey region in  
281 Figure 4 Panel C as well as Supplemental Figure S1), although some parameter

282 combinations (not the maximum likelihood estimate) have substantial process noise

283 (Supplemental Figure S1).

284

285

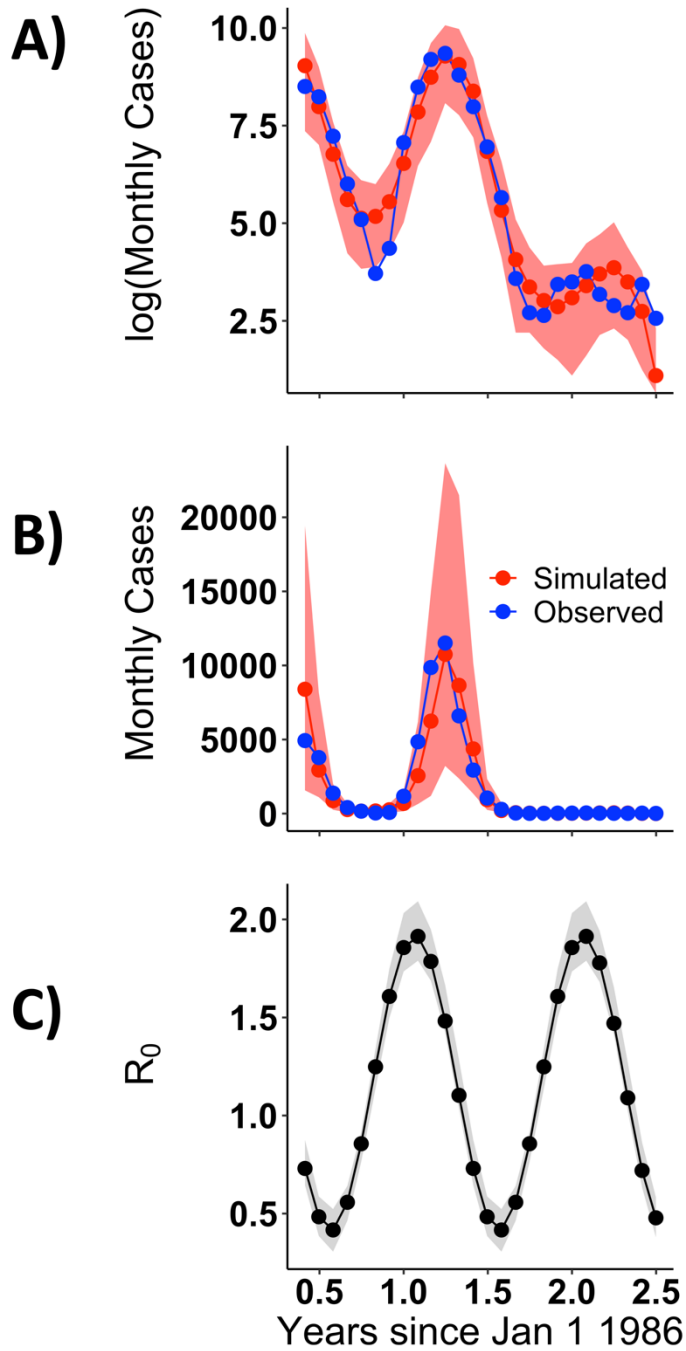

286

287

288 **Fig 4. A-B) Comparison of simulated values with the fitted model and observed**  
289 **data on a log (A) and regular (B) scale.** Observed monthly cases from April 1986 to  
290 June 1988 are shown in blue. Median values from 100 simulations with the maximum  
291 likelihood parameter combination are shown in red. The shaded red region denotes the  
292 2.5% and 97.5%th quantile boundaries from those simulations. **C) Estimates for  $R_0(t)$ .**  
293 The black line denotes the trajectory of  $R_0(t)$  for the maximum likelihood estimate. The  
294 shaded grey region represents the 2.5% and 97.5%th quantile boundaries for  
295 trajectories from all parameter combinations within 2 log likelihood units of the maximum  
296 likelihood estimate. Each parameter combination has only one seasonal trajectory for  
297  $R_0(t)$  since  $R_0(t)$  is a deterministic quantity.  $R_0(t)$  for all parameter estimates ranges from  
298 1.79-2.09 in the on season to 0.31-0.52 in the off-season.  
299

300 We now apply the obtained parameter estimates from the fitted model to  
301 address the expected re-emergence time on the basis of, first, the analytical expression  
302 for the skip calculation (Equation 1), and then the stochastic simulations of the fitted  
303 model. The parameter estimates used here are those for the reporting rate  $\rho$ , the  
304 reproductive number  $R_0$ , and the amplitude of seasonal transmission  $\delta$  from all  
305 combinations within 2 log likelihood units of the MLE. The expected number of skips  
306 following the DENV1 invasion in 1986-1988 is considerably higher than the observed 2  
307 years. Depending on the parameter combination used, we obtain anywhere from 27 to  
308 100 skips (Panel A of Figure 5). Even the fastest estimated return from the skip analysis  
309 (27 years) is much slower than the observed re-emergence time.

310 Forward simulation of the stochastic model likewise does not predict the rapid re-  
311 emergence of DENV1 (Panel B of Figure 5). Under a pulse of 20 infected individuals  
312 arriving per day, there was a low probability of re-emergence for parameter  
313 combinations with low process noise (Panel B of Figure 5). Only parameter  
314 combinations with high amounts of process noise (which have limited predictive value)  
315 had a non-zero emergence probability. We consider alternate pulse rates in

316 Supplemental Figure S14. Re-emergence probabilities under forward simulation of the  
317 stochastic model thus corroborated the deterministic skip findings. The depletion of  
318 susceptible individuals from 1986-1988 and their replenishment via population growth  
319 from 1989-1990 under an aggregate SIR model was unable to explain the rapid re-  
320 emergence of DENV1 in 1990.

321

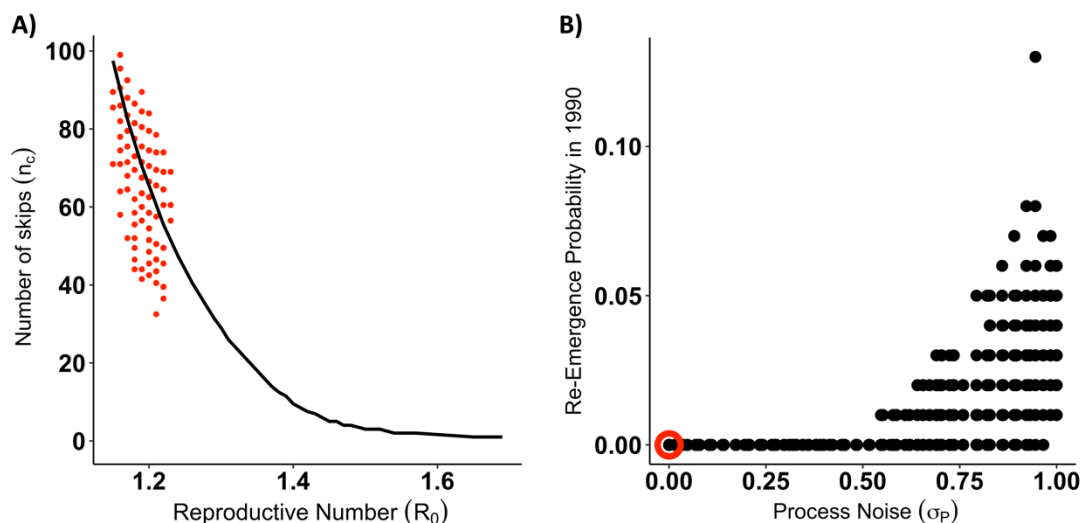

322

323 **Fig 5. A) Expected number of skips ( $n_c$ ) calculated using parameters obtained**  
324 **from the fitted stochastic model.** The open circles show the expected number of  
325 skips  $n_c$  from Equation 1 using parameters and the fraction of the population susceptible  
326 after the initial DENV1 invasion ( $s_0$ ) estimated from the fitted stochastic model. Each  
327 circle corresponds to one parameter combination, and we included here all parameter  
328 combinations for the fitted model with a seasonal transmission amplitude ( $\delta$ ) of 0.7 (  
329 contacts per person per day) and a likelihood value within two log-likelihood units of the  
330 maximum likelihood estimate (MLE). See Figure S15 for expected skips from  
331 parameter combinations with different values of  $\delta$ , and Figure S10 for parameter  
332 combinations from the profile of the recovery rate,  $\gamma$ . For comparison purposes, the  
333 black line shows the expected number of skips for the deterministic skip calculation from  
334 panel B of Figure 2 with the reporting rate  $\rho$  fixed at the literature value of 3%. **B)**  
335 **Probability of epidemic in 1990 under forward stochastic simulation of fitted**  
336 **model.** The fitted stochastic model was simulated forward in time from 1986-1990 with  
337 population growth. A pulse of 20 infected individuals were assumed to arrive each day  
338 in January 1990. Each parameter combination within 2 log likelihood units of the  
339 maximum likelihood estimate was simulated 100 times. The re-emergence probability  
340 was calculated by determining the number of simulations in which the susceptible

341 population decreased in 1990. The plot shows re-emergence probability as a function of  
342 the process noise intensity  $\sigma_P$ . Each point represents a single parameter combination.  
343 The maximum likelihood estimate parameter combination is circled in red.  
344

### 345 **Sensitivity Analysis:**

346 To examine the robustness of our findings to adding an incubation period or  
347 altering the form of seasonality, we conducted a sensitivity analysis by considering both  
348 SIR and SEIR models with spline seasonality. The results are presented and discussed  
349 in the Supporting Information and show that our conclusions remain unchanged. (See  
350 the Supporting Information including Supplemental Figures S2-S7 and Supplemental  
351 Tables ST2 and ST3).

### 352 **Comparison with Vector Model and literature $R_0$**

353 The fitted stochastic SIR model uses a cosine function as a simplification to rep-  
354 resent the seasonal forcing that would be created by climate variation (temperature  
355 (46)) via the changes in infected mosquitos. To evaluate whether this simplification is  
356 realistic, we take two approaches. The first one compares the mean seasonal  $R_0$  result-  
357 ing from our model to values of this reproductive number directly estimated from time  
358 series data in the literature for DENV1 and DENV4 in Rio de Janeiro from 2010-2016.  
359 There is a close match between these very different ways to estimate  $R_0$ , and in particu-  
360 lar the shape of the seasonality produced by our model is realistic (Supplemental Figure  
361 S18).

362 The second approach considers a simple temperature-driven vector model. To  
363 this end, we initially show that the seasonal variation in temperature in Rio de Janeiro  
364 can be approximated via a cosine function (Panel A of Supplemental Figure S19 and  
365 use this approximation to drive a transmission rate that includes the vector explicitly.



366 To obtain an expression for the seasonal transmission rate we consider an ex-  
367 plicit mosquito model with compartments for infectious and susceptible mosquitoes in  
368 which a number of parameters depend on temperature ( $T$ ) (see Section 4 of the Sup-  
369 porting Information). By assuming fast dynamics of the mosquito (so that levels of in-  
370 fection in the mosquito population quickly equilibrate to the dynamics of infection in the  
371 human population), we derive the following expression for the effective transmission  
372 rate in the mosquito-human model in terms of the biting rate  $a(T)$ , probability of human  
373 infection given an infectious bite  $b(T)$ , probability of mosquito infection given biting of an  
374 infectious human  $pMI(T)$ , adult mosquito mortality rate  $\mu_M$ , carrying capacity  $K$  of the  
375 mosquito population, human population size  $N$ , and mosquito demographic function  
376  $g(T)$ :

$$377 \quad \beta_{eff} = \frac{a(T)^2 b(T) (pMI(T))}{\mu_M} \frac{K}{N} \left( 1 - \frac{\mu_M}{g(T)} \right) \quad (2)$$

378

379 The function  $g(T)$  is the product of the eggs laid per female mosquito per gono-  
380 trophic cycle, the mosquito egg-to-adult survival probability, and the mosquito egg-adult  
381 development rate divided by the adult mosquito mortality rate  $\mu_M$ . The temperature-de-  
382 pendence of these components was borrowed from the literature (47, 48) (see Support-  
383 ing Information Section 4 for details).

384 Under the fast dynamics assumption, this effective transmission rate  $\beta_{eff}$  is an  
385 implicit representation of the force of infection inflicted on humans by the vectors of the  
386 coupled human-vector model. When re-scaled between 0 and 1,  $\beta_{eff}$  corresponds  
387 closely with  $\beta_{MLE}$ , the transmission rate from the fitted stochastic SIR cosine model  
388 (Panel B of Supplemental Figure S19). This close correspondence indicates that the

389 SIR cosine model is able to capture the shape of the seasonality of DENV1 in Rio de  
390 Janeiro.

391

## 392 **Discussion**

393         We developed two lines of evidence regarding the uncertainty and predictability  
394 of the time to re-emergence for diseases with low reproductive numbers, on the basis of  
395 a seasonally forced SIR model under the ‘well-mixed’ assumption at aggregated, city-  
396 wide, scales. We showed with an analytical approach that the time to re-emergence  
397 (expressed as the number of “skip” years) was highly sensitive to small changes in  $R_0$   
398 and the fraction of the population still susceptible  $s_0$  at the time of prediction (e.g. at  
399 the end of the initial outbreak). This sensitivity applies to dengue in Rio de Janeiro  
400 where re-emergence times can vary on the order of decades based on literature  
401 parameters. This uncertainty contrasts with previous applications of this analytical  
402 approach to SIR dynamics in childhood diseases such as measles with much higher  $R_0$   
403 values where accurate predictions of much shorter skip times have been made (29). We  
404 also showed with a stochastic SIR model with seasonal transmission fit to DENV1  
405 observed case data for Rio de Janeiro from 1986-1988 that susceptible depletion and  
406 replenishment are insufficient to explain dengue re-emergence. The fitted model failed  
407 to predict by far the re-emergence of DENV1 in 1990 in terms of either the number of  
408 skips expected or the outbreak probability under forward simulation.

409         Transmission parameters like  $R_0$  are generally defined with respect to a particular  
410 model. Given that we aggregated cases at the city level and used a short time series,  
411 care should be taken in interpreting parameter values. Nevertheless, fitted transmission  
412 parameters correspond well with literature values and exhibit well-defined confidence

413 intervals. Estimates of the reporting rate in particular closely match the 3% value (8)  
414 obtained via a serological study conducted during the 1986 invasion (8, 33). Reporting  
415 rates during the onset of an epidemic may be much lower in regions that have not  
416 recently experienced transmission (33, 49) than in those with re-occurring outbreaks  
417 and an established surveillance network. This may explain why serological studies of  
418 the 1986 invasion (8, 33) and our results, estimate a lower reporting rate for dengue  
419 than studies conducted in later years in Brazil (50). Even though different combinations  
420 of the transmission rate and duration of infection can yield the same reproductive  
421 number, the parameter estimates that compose  $R_0$  across all models considered in the  
422 sensitivity analysis (which take into account those different combinations) are relatively  
423 well-defined. These values are also consistent with the effective reproductive number  
424 estimated for local dengue epidemics from 2012-2016 (44) and 1996-2014 (45) taking  
425 into account differences in serotype circulation and population size during those  
426 periods.

427 More complex model structures are possible and often used for arboviruses that  
428 include an explicit representation of the vector. We expect our results to hold as this  
429 vector component should largely affect the phase and shape of seasonality in the  
430 transmission between human hosts, which we have modeled phenomenologically as a  
431 cosine wave. With two typical successive epidemic years from an emergent virus,  
432 parameter inference from such short observation period is unlikely to justify a more  
433 complex model. Nevertheless, to examine transmission seasonality further, we  
434 compared the seasonal  $R_0$  resulting from the fitted model to the seasonal  $R_0$  directly  
435 estimated from time series of cases in the literature (44). We also considered the  
436 transmission rate experienced by humans in a simple vector-human model forced by  
437 the typical seasonality of temperature in Rio de Janeiro. The shape and timing of the

438 vector-human model's transmission rate was comparable to that of the cosine  
439 transmission rate we employed. More complex models that do not assume fast  
440 dynamics of infection in the vector relative to epidemic spread would likely exhibit a  
441 difference relative to our transmission rate, especially a delayed phase, whose  
442 consequences should be examined in future work. We posit that this difference would  
443 not influence our results on the predictability and uncertainty of re-emergence, since the  
444 values of other parameters (such as the length of infection in humans) can compensate  
445 for it.

446       Factors that could explain the observed rapid re-emergence include inter-annual  
447 climate anomalies, antigenic evolution, or micro-scale spatial heterogeneity in  
448 transmission intensity and associated susceptible depletion. Larvae washout following  
449 flooding coupled with temperature-driven seasonality in transmission could have  
450 temporarily halted the invasion in 1988 and delayed the epidemic in 1989. Widespread  
451 flooding was reported in February 1988 (51). Large amounts of rainfall washed away  
452 mosquito larvae in lab and field studies (52). High rainfall negatively affected dengue  
453 transmission in Singapore (53, 54) and India (55). The impact could be compounded in  
454 Rio de Janeiro if the high rainfall occurs during the transmission season. If the larvae  
455 population has not fully recovered before the start of the off-season, the impact of the  
456 rainfall anomaly could extend to the subsequent season.

457       The large amount of process noise observed in the aggregate model would be  
458 consistent with this effect, given that the process noise parameter  $\sigma_P$  represents random  
459 variation in the transmission rate due to environmental factors. However, the model's  
460 inherent structure limits its ability to take into account flooding events via  $\sigma_P$ , since the  
461 magnitude of the process noise does not change between years. Incorporating an inter-

462 annual climate driver could provide more accurate re-emergence predictions. The  
463 response to rainfall would be nonlinear: positive at low to moderate levels and negative  
464 at higher ones.

465 Intra-serotype antigenic evolution from 1986-1990 could also facilitate faster re-  
466 emergence. Many models focus on inter-serotype variation and assume long-lasting  
467 homosubtypic immunity (18, 19, 21). However, the antigenic variation within and across  
468 dengue serotypes is comparable (56), and antigenic differences between strains of the  
469 same serotype influence overall dengue evolution (57). Sequences associated with  
470 case data were unavailable, making direct analysis challenging. We cannot rule out the  
471 possibility that genetic differences between the circulating strains enabled re-infection. A  
472 future SIRS-type model (Susceptible-Infected-Recovered-Susceptible) could  
473 incorporate this intra-serotype antigenic evolution.

474 Micro-scale spatial heterogeneity in transmission intensity and the effects of  
475 human movement between neighborhoods could also explain the rapid re-emergence.  
476 Small-scale differences in socioeconomic status and population density between  
477 neighborhoods in a large city can result in different relationships between mosquito and  
478 human population sizes, resulting in widespread heterogeneity in  $R_0$  across  
479 neighborhoods (58). Previous studies of mosquito trap data in the city have  
480 demonstrated that neighborhoods with differing socioeconomic characteristics have  
481 different vector population patterns (46). In fact, schoolchildren from neighborhoods  
482 with divergent socioeconomic characteristics had varying levels of seroconversion  
483 during the 1986 invasion (33). Human movement between neighborhoods may also  
484 influence transmission within (59) and between (60) those neighborhoods, potentially  
485 resulting in non-uniform depletion of susceptible populations between highly connected

486 and isolated areas of a city. Whether arising through the effects of spatial heterogeneity  
487 in transmission or intra-city movement, non-uniform levels of herd immunity could  
488 enable faster re-emergence.

489         Our findings reveal the uncertainty of re-emergence predictions with the simplest  
490 SIR models, those that would be most useful at times of emergent public health threats.  
491 Consideration of the above factors in transmission models whose goal is to inform  
492 public health over large regions, and to do so soon after, if not during, an emergent  
493 outbreak, is clearly a challenge. For example, coarse resolutions are typically used  
494 because of the scales at which the observed cases are reported, the scales at which the  
495 climate covariates are available, and the difficulties inherent in incorporating microscale  
496 variation including connectivity. Our results should motivate further research into the  
497 central question of how we can scale microscale heterogeneity to formulate aggregated  
498 models that include it implicitly. It should also motivate the related further understanding  
499 of how such microscale heterogeneity influences susceptible depletion and  
500 replenishment in particular case studies. From such efforts, we should be able to  
501 evaluate whether the increasing availability of high-resolution data makes it feasible to  
502 parameterize transmission models at higher resolutions, or to inform new model  
503 formulations at coarser resolutions.

504         The inability of susceptible depletion and replenishment in a simple seasonal SIR  
505 formulation at a large, city-wide scale, to explain DENV1 re-emergence has potential  
506 implications for other arboviruses. Recent long-term Zika forecasts (31) assume that  
507 susceptible depletion and replenishment brought an end to the 2015-2017 epidemics  
508 and will determine when re-emergence occurs. DENV1 and Zika share the same vector  
509 and invaded a completely susceptible population (not accounting for pre-existing cross-

510 immunity from dengue). If factors absent from the basic model were key drivers of  
511 DENV1 inter-annual variability, it would not be unreasonable to infer that similar types of  
512 factors could have played a major role in the Zika dynamics observed from 2015-2017.  
513 Zika re-emergence could similarly occur much earlier than expected.

514         With changing temperature patterns due to climate change, cities in Asia,  
515 Europe, and the western hemisphere that currently do not have recurrent local  
516 transmission may transition in the near future to the kinds of dynamics studied here. Our  
517 results suggest that estimates should be interpreted in the context of this sensitivity to  
518 small changes in the reporting rate and reproductive number. Factors like variation in  
519 reporting rates, micro-scale transmission heterogeneity and inter-annual climate drivers  
520 that are often ignored in long-term forecasts may thus become critical in determining re-  
521 emergence times. Overall, the large uncertainty in re-emergence times may be  
522 unavoidable for these regions. Improved models are needed together with richer data  
523 than currently used, to address the question of the relevant spatial scales of susceptible  
524 depletion.

525

## 526 **Materials and methods**

527         The derivation of the expression for the number of skip years (Equation 1) is  
528 included in Section 1 of the Supporting Information. We fitted a stochastic version of the  
529 SIR model to observed monthly case counts in Rio de Janeiro from 1986-1988 to  
530 estimate parameters needed to apply this expression, and also to separately predict in  
531 parallel the time to re-emergence via numerical simulation. Expected re-emergence  
532 times were then compared for the two approaches.

### 533 **Data Description**

534 We used monthly dengue case estimates in the city of Rio de Janeiro, Brazil  
535 from 1986-1990. Cases were reported to the local public health surveillance system (9,  
536 10). The case counts did not contain serotype information, but prior studies indicated  
537 that the dengue serotype DENV1 invaded the city of Rio de Janeiro in 1986 (10) and  
538 was the dominant serotype in circulation in the state of Rio de Janeiro from 1986-1990  
539 (8) prior to the arrival of DENV2 in 1990. DENV2 did not become dominant until 1991  
540 (9).

### 541 **Basic Model Formulation**

542 Because dengue infection confers full immunity to the same serotype, we  
543 considered an SIR (Susceptible-Infected-Recovered) model. The deterministic model  
544 for the number of individuals in the Susceptible ( $S$ ), Infected ( $I$ ), or Recovered ( $R$ ) class  
545 is given by the following system of ordinary differential equations:

$$546 \frac{dS}{dt} = rN - \lambda(t)S - \mu_H S \quad (3)$$

$$547 \frac{dI}{dt} = \lambda(t)S - \gamma I - \mu_H I \quad (4)$$

$$548 \frac{dR}{dt} = \gamma I - \mu_H R \quad (4)$$

549

$$550 \lambda(t) = \beta(t) \left( \frac{I}{N} \right) \quad (5)$$

551



552

553 
$$\beta(t) = \beta_0(1 + \delta \sin(\omega t + \phi))$$
  
(6)

554 Deaths occur at rate ( $\mu_H$ ) given by the inverse of the life expectancy of Brazil in  
555 2012 (74.49 years(35)). All individuals are born susceptible. The term  $r$  represents  
556 population growth. The human population growth rate was estimated from census  
557 resident population estimates in 1991 (36) and 2000 (37) assuming exponential growth.  
558 This rate was used to interpolate the estimated population in 1986 (See Supporting  
559 Information Section 2.1.1 for details).

560 The per capita rate at which susceptible individuals become infected was given  
561 by the force of infection  $\lambda(t)$  (Equation 5). Individuals recovered at per-capita rate  $\gamma$   
562 whose inverse is the duration of infection. Estimates of the duration of infection in  
563 dengue vary. One analysis estimated that symptoms of dengue infection last 2-7 days  
564 following an incubation period of 4-10 days (61, 62). For our analysis, we fixed the  
565 recovery rate  $\gamma$  to be 1/17, assuming an exponentially distributed duration of infection  
566 with mean of 17 days encapsulating the maximum extent of the combined incubation  
567 and symptomatic period in humans. We take into account the possibility that duration of  
568 infection could vary by profiling over the duration of infection in the sensitivity analysis.  
569 The short duration of the available time series meant that fitting a formal vector model  
570 could prove difficult and could require additional assumptions in terms of which  
571 parameters could be fitted or fixed from existing formulations in the literature. We  
572 therefore used an SIR framework in which the infected stage served as a proxy for the  
573 exposed and infected human and vector compartments in a vector model of dengue  
574 transmission. A duration of infection was thus chosen to also take into account the

575 external incubation period in the mosquito, which can range from 5-33 days at 25°C to  
576 2-15 days at 30°C (63). We profiled over the duration of infection in the sensitivity  
577 analysis to verify that this parameterization is reasonable.

578 This transmission rate  $\beta(t)$  was represented as a cosine function with mean  $\beta_0$ ,  
579 (units of contacts per person per day) and seasonal oscillations of amplitude  $\delta$  (same  
580 units as  $\beta_0$ ) and frequency  $\omega$ , which was assumed to be annual ( $\omega = 2\pi/365$ ) days<sup>-1</sup>. The  
581 annual mean  $R_0$  was thus given by:

$$582 \quad R_0 = \frac{\beta_0}{\gamma + \mu} \quad (8)$$

583 The observed dengue data in Rio de Janeiro consisted of monthly case counts.  
584 Serological studies of the DENV1 invasion in Rio de Janeiro also indicated substantial  
585 under-reporting (8, 33). Let  $C$  represent the true number of monthly cases that would be  
586 obtained by summing the number of individuals entering the infected class ( $I$ ) over the  
587 course of a month. For the purposes of the skip analysis, we assume that a fixed  
588 fraction  $\rho$  of the true cases  $C$  are observed, where  $\rho$  is the reporting rate.

589 The stochastic model is an approximation of the deterministic one used for the  
590 skip analysis. For simplicity and given the short time interval, we assumed that there  
591 was no population growth over the two and half years of the DENV1 invasion ( $r = \mu_H$ )  
592 and that births and deaths occurred at rate  $\mu_H = (1/(74.9*365))$ , which is equal to the  
593 inverse of the average life expectancy in Brazil from the 2010 census (35). However,  
594 population growth is taken into account when simulating forward in time from the fitted  
595 stochastic model. We also assumed that there were no recovered individuals at the start

596 of the epidemic, so all other individuals in the population not initially infected were  
597 susceptible. We considered time in units of days and used a time step  $\Delta t$  of 1 day.  
598 The stochastic model is a discrete-time model with fixed time step  $\Delta t$  and a discrete  
599 state space (i.e. the number of people in each compartment  $S$ ,  $I$ ,  $R$ , and  $C$ , at any point  
600 in time must be integers). The number of individuals who moved from one compartment  
601 to another over the course of each day was calculated via Euler simulation from the  
602 deterministic equations (See Supporting Information). Demographic stochasticity was  
603 then incorporated into the Euler approximations to obtain integer state variable values  
604 after each time step. We specifically assumed that the number of individuals making  
605 each state transition was drawn from a binomial distribution with exponentially decaying  
606 probability (See Supporting Information). Environmental noise (variation in the  
607 transmission rate  $\beta(t)$  due to random environmental variation) was captured via  
608 multiplicative gamma white noise in the transmission rate as described by (64, 65). On  
609 time step size  $\Delta t$ , we multiplied the transmission rate by  $\Delta\Gamma / \Delta t$ , where  $\Delta\Gamma / \Delta t$  was  
610 drawn from a Gamma distribution with mean 1 and variance  $\sigma_P^2 / \Delta t$ .

611 The measurement model assumed that the observed number of monthly dengue  
612 cases ( $Y(t)$ ) at time  $t$  were drawn from a negative binomial distribution with mean equal  
613 to the true number of monthly cases  $C$  multiplied by a reporting rate  $\rho$ , with dispersion  
614 parameter  $\sigma_M$ . More details of the measurement model can be found in Section 2.4 of  
615 the Supporting Information.

### 616 **Fitting the stochastic model**

617 We fitted the transmission parameters ( $\beta_0$  and  $\delta$ ), reporting rate ( $\rho$ ), process  
618 noise parameter ( $\sigma_P$ ), measurement noise parameter ( $\sigma_M$ ), and the number of infected

619 individuals at the start of the outbreak in May 1986 ( $I_0$ ). While the first cases of DENV1  
620 were reported in April 1986, we started the model fitting in May 1986 to avoid  
621 complications from changes in the reporting rate as the surveillance system was  
622 established during the start of the DENV1 invasion. We used in an interpolated initial  
623 population size of 528,1842 for Rio de Janeiro in May 1986. The model was fit using the  
624 mif2 method in the R-package pomp. The model fitting method is described further in  
625 the Supporting Information and in (66).

### 626 **Calculating expected skips using parameter estimates from stochastic model**

627       Following the completion of the Monte Carlo Profiles, final parameter  
628 combinations from all profiles were pooled together to obtain both a maximum likelihood  
629 estimate (MLE) parameter combination as well as all parameter combinations that were  
630 within 2 log likelihood units of the maximum likelihood estimate. The table of MLE  
631 parameter values is shown in Supplemental Table ST1. The reporting rate ( $\rho$ ),  $\beta_0$ , and  
632  $\delta$  value of each parameter combination within 2 log likelihood units of the maximum  
633 likelihood estimate were applied to a finer gridded version of the deterministic skip  
634 calculation described earlier. A distribution for the number of skips expected in Rio de  
635 Janeiro following the DENV1 invasion from 1986-1988 was obtained.

### 636 **Stochastic Simulation**

637       We then simulated re-emergence probabilities under the stochastic model. Each  
638 parameter combination within 2 log likelihood units of the MLE estimate from the  
639 stochastic fit was simulated again without any immigration from 1986 until 1990 but with  
640 population growth. During January 1990, “sparks” of infectious individuals were  
641 assumed to have arrived in the city at some fixed rate. We explored rates from 5 to 100  
642 infected individuals per day. This process was repeated 100 times, and the probability

643 of an epidemic occurring in 1990 was calculated. An epidemic occurrence in this  
644 situation was defined as a net decrease in the susceptible population over the course of  
645 the year (after taking into account population growth), to best match the definition of an  
646 epidemic used in the skip analysis.

## 647 **Sensitivity Analysis**

648 We assessed how parameter estimates of  $R_0$  and  $\rho$  may depend on the model  
649 formulation by fitting several more complex SIR-type models to the same data using the  
650 fitting procedure described in the Methods section: an SIR Spline Model and SEIR  
651 Spline Model. As an additional sensitivity analysis, we profiled over the recovery rate for  
652 the SIR Cosine Model (Supplemental Figure S9). For details, see the Supporting  
653 Information.

## 654 **Comparison with Vector Model and literature $R_0$**

655 For a full description of the explicit coupled human-mosquito model with  
656 compartments for infectious and susceptible mosquitoes and comparison of  
657 transmission rates between this model and the simpler seasonally forced SIR, see the  
658 Supporting Information.

659

## 660 **References**

661

- 662 1. Bhatt S, Gething PW, Brady OJ, Messina JP, Farlow AW, Moyes CL, et al. The global  
663 distribution and burden of dengue. *Nature*. 2013;496(7446):504.
- 664 2. Baud D, Gubler DJ, Schaub B, Lanteri MC, Musso D. An update on Zika virus infection.  
665 *The Lancet*. 2017;390(10107):2099-109.
- 666 3. Petersen LR, Jamieson DJ, Powers AM, Honein MA. Zika Virus. *New England Journal*  
667 *of Medicine*. 2016;374(16):1552-63.
- 668 4. Nasci RS. Movement of Chikungunya Virus into the Western Hemisphere. *Emerging*  
669 *Infectious Diseases*. 2014;20(8):1394-5.

- 670 5. Nogueira RM, Eppinghaus AL. Dengue virus type 4 arrives in the state of Rio de Janeiro:  
671 a challenge for epidemiological surveillance and control. *Memórias do Instituto Oswaldo Cruz*.  
672 2011;106:255-6.
- 673 6. Zanluca C, de Melo VCA, Mosimann ALP, dos Santos GIV, dos Santos CND, Luz K.  
674 First report of autochthonous transmission of Zika virus in Brazil. *Memórias do Instituto*  
675 *Oswaldo Cruz*. 2015;110(4):569-72.
- 676 7. Nunes MRT, Faria NR, de Vasconcelos JM, Golding N, Kraemer MUG, de Oliveira LF,  
677 et al. Emergence and potential for spread of Chikungunya virus in Brazil. *BMC Medicine*.  
678 2015;13(1):102.
- 679 8. Nogueira RMR, Miagostovich MP, Schatzmayr HG, Santos FBd, Araújo ESMd, Filippis  
680 AMBd, et al. Dengue in the State of Rio de Janeiro, Brazil, 1986-1998. *Memórias do Instituto*  
681 *Oswaldo Cruz*. 1999;94:297-304.
- 682 9. Nogueira RMR, Miagostovich MP, Lampe E, Souza RW, Zagne SMO, Schatzmayr HG.  
683 Dengue Epidemic in the State of Rio de Janeiro, Brazil, 1990-1: Co-Circulation of Dengue 1 and  
684 Dengue 2 Serotypes. *Epidemiol Infect*. 1993;111(1):163-70.
- 685 10. Miagostovich MP, Nogueira RM, Cavalcanti S, Marzochi KB, Schatzmayr HG. Dengue  
686 epidemic in the state of Rio de Janeiro, Brazil: virological and epidemiological aspects. *Revista*  
687 *do Instituto de Medicina Tropical de São Paulo*. 1993;35(2):149-54.
- 688 11. O'Reilly KM, Lowe R, Edmunds WJ, Mayaud P, Kucharski A, Eggo RM, et al.  
689 Projecting the end of the Zika virus epidemic in Latin America: a modelling analysis. *BMC*  
690 *medicine*. 2018;16(1):180-.
- 691 12. Struchiner CJ, Rocklöv J, Wilder-Smith A, Massad E. Increasing Dengue Incidence in  
692 Singapore over the Past 40 Years: Population Growth, Climate and Mobility. *PLOS ONE*.  
693 2015;10(8):e0136286.
- 694 13. Stewart-Ibarra AM, Lowe R. Climate and non-climate drivers of dengue epidemics in  
695 southern coastal ecuador. *Am J Trop Med Hyg*. 2013;88(5):971-81.
- 696 14. Vincenti-Gonzalez MF, Tami A, Lizarazo EF, Grillet ME. ENSO-driven climate  
697 variability promotes periodic major outbreaks of dengue in Venezuela. *Scientific reports*.  
698 2018;8(1):5727-.
- 699 15. Hii YL, Rocklöv J, Ng N, Tang CS, Pang FY, Sauerborn R. Climate variability and  
700 increase in intensity and magnitude of dengue incidence in Singapore. *Global Health Action*.  
701 2009;2(1):2036.
- 702 16. Harris M, Caldwell JM, Mordecai EA. Climate drives spatial variation in Zika epidemics  
703 in Latin America. *bioRxiv*. 2019:454454.
- 704 17. Cazelles B, Chavez M, McMichael AJ, Hales S. Nonstationary Influence of El Niño on  
705 the Synchronous Dengue Epidemics in Thailand. *PLOS Medicine*. 2005;2(4):e106.
- 706 18. Recker M, Blyuss Konstantin B, Simmons Cameron P, Hien Tran T, Wills B, Farrar J, et  
707 al. Immunological serotype interactions and their effect on the epidemiological pattern of  
708 dengue. *Proceedings of the Royal Society B: Biological Sciences*. 2009;276(1667):2541-8.
- 709 19. Reich NG, Shrestha S, King AA, Rohani P, Lessler J, Kalayanarooj S, et al. Interactions  
710 between serotypes of dengue highlight epidemiological impact of cross-immunity. *Journal of*  
711 *The Royal Society Interface*. 2013;10(86).
- 712 20. Cummings DAT, Schwartz IB, Billings L, Shaw LB, Burke DS. Dynamic effects of  
713 antibody-dependent enhancement on the fitness of viruses. *Proceedings of the National Academy*  
714 *of Sciences of the United States of America*. 2005;102(42):15259.
- 715 21. Ferguson N, Anderson R, Gupta S. The effect of antibody-dependent enhancement on the  
716 transmission dynamics and persistence of multiple-strain pathogens. *Proceedings of the National*  
717 *Academy of Sciences of the United States of America*. 1999;96(2):790-4.

- 718 22. Bjørnstad ON, Finkenstädt BF, Grenfell BT. Dynamics of measles epidemics: estimating  
719 scaling of transmission rates using a time series SIR model. *Ecological Monographs*.  
720 2002;72(2):169-84.
- 721 23. Earn DJD, Rohani P, Bolker BM, Grenfell BT. A Simple Model for Complex Dynamical  
722 Transitions in Epidemics. *Science*. 2000;287(5453):667-70.
- 723 24. Finkenstädt B, Grenfell B. Empirical determinants of measles metapopulation dynamics  
724 in England and Wales. *Proc Biol Sci*. 1998;265(1392):211-20.
- 725 25. Graham M, Winter AK, Ferrari M, Grenfell B, Moss WJ, Azman AS, et al. Measles and  
726 the canonical path to elimination. *Science*. 2019;364(6440):584-7.
- 727 26. Grenfell BT, Bjørnstad ON, Finkenstädt BF. DYNAMICS OF MEASLES EPIDEMICS:  
728 SCALING NOISE, DETERMINISM, AND PREDICTABILITY WITH THE TSIR MODEL.  
729 *Ecological Monographs*. 2002;72(2):185-202.
- 730 27. Domenech de Cellès M, Magpantay FMG, King AA, Rohani P. The impact of past  
731 vaccination coverage and immunity on pertussis resurgence. *Science Translational Medicine*.  
732 2018;10(434):eaaj1748.
- 733 28. Lavine JS, King AA, Bjørnstad ON. Natural immune boosting in pertussis dynamics and  
734 the potential for long-term vaccine failure. *Proceedings of the National Academy of Sciences*.  
735 2011;108(17):7259-64.
- 736 29. Stone L, Olinky R, Huppert A. Seasonal dynamics of recurrent epidemics. *Nature*.  
737 2007;446(7135):533.
- 738 30. Lowe R, Bailey TC, Stephenson DB, Jupp TE, Graham RJ, Barcellos C, et al. The  
739 development of an early warning system for climate-sensitive disease risk with a focus on  
740 dengue epidemics in Southeast Brazil. *Statistics in medicine*. 2012;32(5):864-83.
- 741 31. Ferguson NM, Cucunubá ZM, Dorigatti I, Nedjati-Gilani GL, Donnelly CA, Basáñez M-  
742 G, et al. Countering the Zika epidemic in Latin America. *Science*. 2016;353(6297):353-4.
- 743 32. Imai N, Dorigatti I, Cauchemez S, Ferguson NM. Estimating Dengue Transmission  
744 Intensity from Case-Notification Data from Multiple Countries. *PLOS Neglected Tropical*  
745 *Diseases*. 2016;10(7):e0004833.
- 746 33. Figueiredo LTM, Cavalcante SMB, Simoes MC. Dengue serologic survey of  
747 schoolchildren in Rio de Janeiro, Brazil, in 1986 and 1987. 1990.
- 748 34. Olinky R, Huppert A, Stone L. Seasonal dynamics and thresholds governing recurrent  
749 epidemics. *Journal of Mathematical Biology*. 2008;56(6):827-39.
- 750 35. (IBGE) BIoGaS. Brazil Demographic Census 2010. . Rio de Janeiro, Brazil: Brazilian  
751 Institute of Geography and Statistics (IBGE). 2012.
- 752 36. (IBGE) BIoGaS. "Censo Demográfico- 1991-Rio de Janeiro". 1991;"Censo  
753 demográfico : 1991 : resultados do universo relativos as características da população e dos  
754 domicílios"(Table 1.4: "População residente, por grupos de idade, segundo ti lolesorregiães, as  
755 Microrregiões, os Municípios,os Distritos e o sexo"):32-41.
- 756 37. (IBGE) BIoGaS. Censo Demográfico. 2000(População residente, sexo e situação do  
757 domicílio; Total column).
- 758 38. Dick OB, San Martín JL, Montoya RH, del Diego J, Zambrano B, Dayan GH. The  
759 history of dengue outbreaks in the Americas. *The American journal of tropical medicine and*  
760 *hygiene*. 2012;87(4):584-93.
- 761 39. Severo OP. Eradication of the *Aedes aegypti* mosquito from the Americas. 1955.
- 762 40. Löwy I. Leaking Containers: Success and Failure in Controlling the Mosquito *Aedes*  
763 *aegypti* in Brazil. *Am J Public Health*. 2017;107(4):517-24.
- 764 41. PAHO. The feasibility of erradicating *Aedes aegypti* in the Americas. *Pan Am J Public*  
765 *Health*. 1997;1.

- 766 42. Souza NCSe, Félix AC, de Paula AV, Levi JE, Pannuti CS, Romano CM. Evaluation of  
767 serological cross-reactivity between yellow fever and other flaviviruses. *International Journal of*  
768 *Infectious Diseases*. 2019;81:4-5.
- 769 43. de Carvalho JAM. Demographic dynamics in Brazil: recent trends and perspectives.  
770 *Brazilian journal of population studies*. 1997;1(1):5-23.
- 771 44. Codeço CT, Villela DA, Coelho FC. Estimating the effective reproduction number of  
772 dengue considering temperature-dependent generation intervals. *Epidemics*. 2018;25:101-11.
- 773 45. Coelho FC, Carvalho LMD. Estimating the Attack Ratio of Dengue Epidemics under  
774 Time-varying Force of Infection using Aggregated Notification Data. *Scientific Reports*.  
775 2015;5:18455.
- 776 46. Honório NA, Codeço CT, Alves FC, Magalhães MAFM, Lourenço-de-Oliveira R.  
777 Temporal Distribution of *Aedes aegypti* in Different Districts of Rio De Janeiro, Brazil,  
778 Measured by Two Types of Traps. *Journal of Medical Entomology*. 2009;46(5):1001-14.
- 779 47. Mordecai EA, Cohen JM, Evans MV, Gudapati P, Johnson LR, Lippi CA, et al.  
780 Detecting the impact of temperature on transmission of Zika, dengue, and chikungunya using  
781 mechanistic models. *PLOS Neglected Tropical Diseases*. 2017;11(4):e0005568.
- 782 48. Otero M, Schweigmann N, Solari HG. A Stochastic Spatial Dynamical Model for *Aedes*  
783 *Aegypti*. *Bulletin of Mathematical Biology*. 2008;70(5):1297.
- 784 49. Musa SS, Zhao S, Chan H-S, Jin Z, He D. A mathematical model to study the 2014–2015  
785 large-scale dengue epidemics in Kaohsiung and Tainan cities in Taiwan, China. *Mathematical*  
786 *biosciences and engineering*. 2019.
- 787 50. Imai N, Dorigatti I, Cauchemez S, Ferguson NM. Estimating dengue transmission  
788 intensity from sero-prevalence surveys in multiple countries. *PLoS neglected tropical diseases*.  
789 2015;9(4):e0003719-e.
- 790 51. Ap. 127 Die in Floods and Mud Slides in Brazil. *New York Times*. 1988 02/08/  
791 1988 Feb 08.
- 792 52. Fouque F, Carinci R, Gaborit P, Issaly J, Bicout DJ, Sabatier P. *Aedes aegypti* survival  
793 and dengue transmission patterns in French Guiana. *Journal of Vector Ecology*. 2006;31(2):390-  
794 400.
- 795 53. Benedum CM, Seidahmed OME, Eltahir EAB, Markuzon N. Statistical modeling of the  
796 effect of rainfall flushing on dengue transmission in Singapore. *PLOS Neglected Tropical*  
797 *Diseases*. 2018;12(12):e0006935.
- 798 54. Seidahmed OME, Eltahir EAB. A Sequence of Flushing and Drying of Breeding Habitats  
799 of *Aedes aegypti* (L.) Prior to the Low Dengue Season in Singapore. *PLOS Neglected Tropical*  
800 *Diseases*. 2016;10(7):e0004842.
- 801 55. Kakarla SG, Caminade C, Mutheneni SR, Morse AP, Upadhyayula SM, Kadiri MR, et al.  
802 Lag effect of climatic variables on dengue burden in India. *Epidemiol Infect*. 2019;147:e170.
- 803 56. Katzelnick LC, Fonville JM, Gromowski GD, Arriaga JB, Green A, James SL, et al.  
804 Dengue viruses cluster antigenically but not as discrete serotypes. *Science*.  
805 2015;349(6254):1338.
- 806 57. Bell S, Katzelnick L, Bedford T. Dengue antigenic relationships predict evolutionary  
807 dynamics. *bioRxiv*. 2019:432054.
- 808 58. Romeo-Aznar V, Paul R, Telle O, Pascual M. Mosquito-borne transmission in urban  
809 landscapes: the missing link between vector abundance and human density. *Proceedings of the*  
810 *Royal Society B: Biological Sciences*. 2018;285(1884):20180826.
- 811 59. Stoddard ST, Forshey BM, Morrison AC, Paz-Soldan VA, Vazquez-Prokopec GM,  
812 Astete H, et al. House-to-house human movement drives dengue virus transmission. *Proceedings*  
813 *of the National Academy of Sciences*. 2013;110(3):994-9.



- 814 60. Guzzetta G, Marques-Toledo CA, Rosà R, Teixeira M, Merler S. Quantifying the spatial  
815 spread of dengue in a non-endemic Brazilian metropolis via transmission chain reconstruction.  
816 Nature Communications. 2018;9(1):2837.
- 817 61. Organization WH. Dengue and severe dengue. Fact sheet Updated April 2017. 2017.
- 818 62. Organization WH. Dengue and severe dengue. World Health Organization. Regional  
819 Office for the Eastern Mediterranean; 2014.
- 820 63. Chan M, Johansson MA. The Incubation Periods of Dengue Viruses. PLOS ONE.  
821 2012;7(11):e50972.
- 822 64. Bretó C, Ionides EL. Compound markov counting processes and their applications to  
823 modeling infinitesimally over-dispersed systems. Stochastic Processes and their Applications.  
824 2011;121(11):2571-91.
- 825 65. He D, Ionides EL, King AA. Plug-and-play inference for disease dynamics: measles in  
826 large and small populations as a case study. Journal of the Royal Society Interface.  
827 2009;7(43):271-83.
- 828 66. Ionides EL, Nguyen D, Atchadé Y, Stoev S, King AA. Inference for dynamic and latent  
829 variable models via iterated, perturbed Bayes maps. Proceedings of the National Academy of  
830 Sciences. 2015;112(3):719-24.  
831
